# Supplementary figures and images for: Mulberry-like heterostructure (Fe–O–Ti): a novel sensing material for ethanol gas sensors
Source: Royal Society of Chemistry journal article supplement (doi:10.1039/c9ra00619b), 2019-01-01

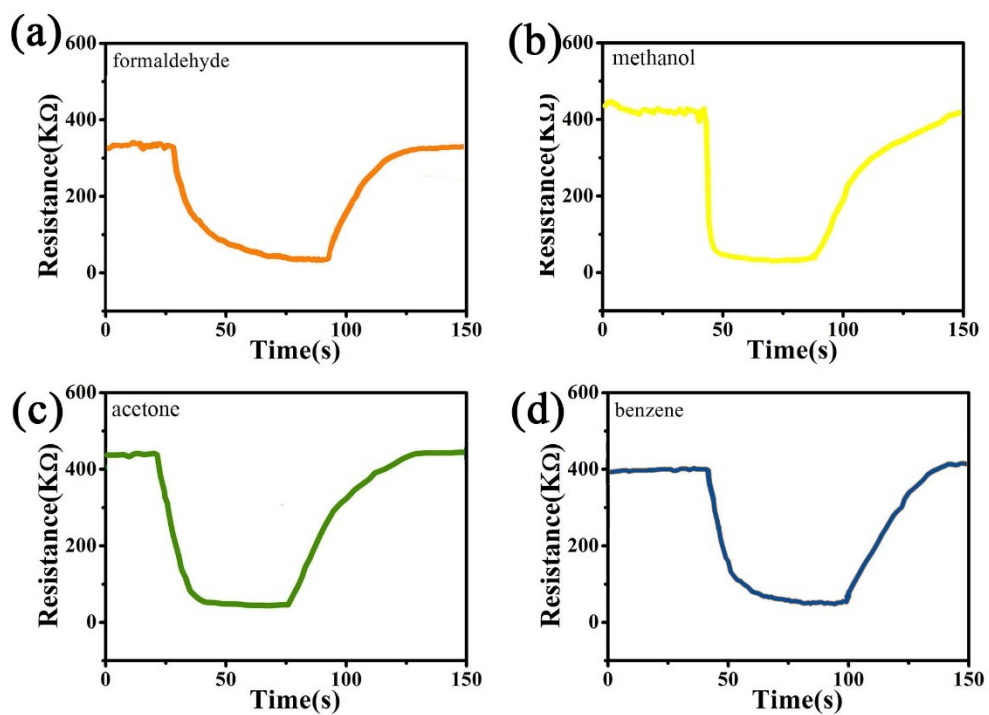

Fig. S1 The response-recovery time curves of (a) formaldehyde, (b) methanol, (c) acetone, (d) benzene.

Supplement: c9ra00619b1.pdf [file c9ra00619b1.pdf]
